# Supplementary material
Source: PubMed Central journal article supplement (PMC5100814)
Supplement: NIHMS811349-supplement-Supplement.pdf [file NIHMS811349-supplement-Supplement.pdf]

**Figure S1**

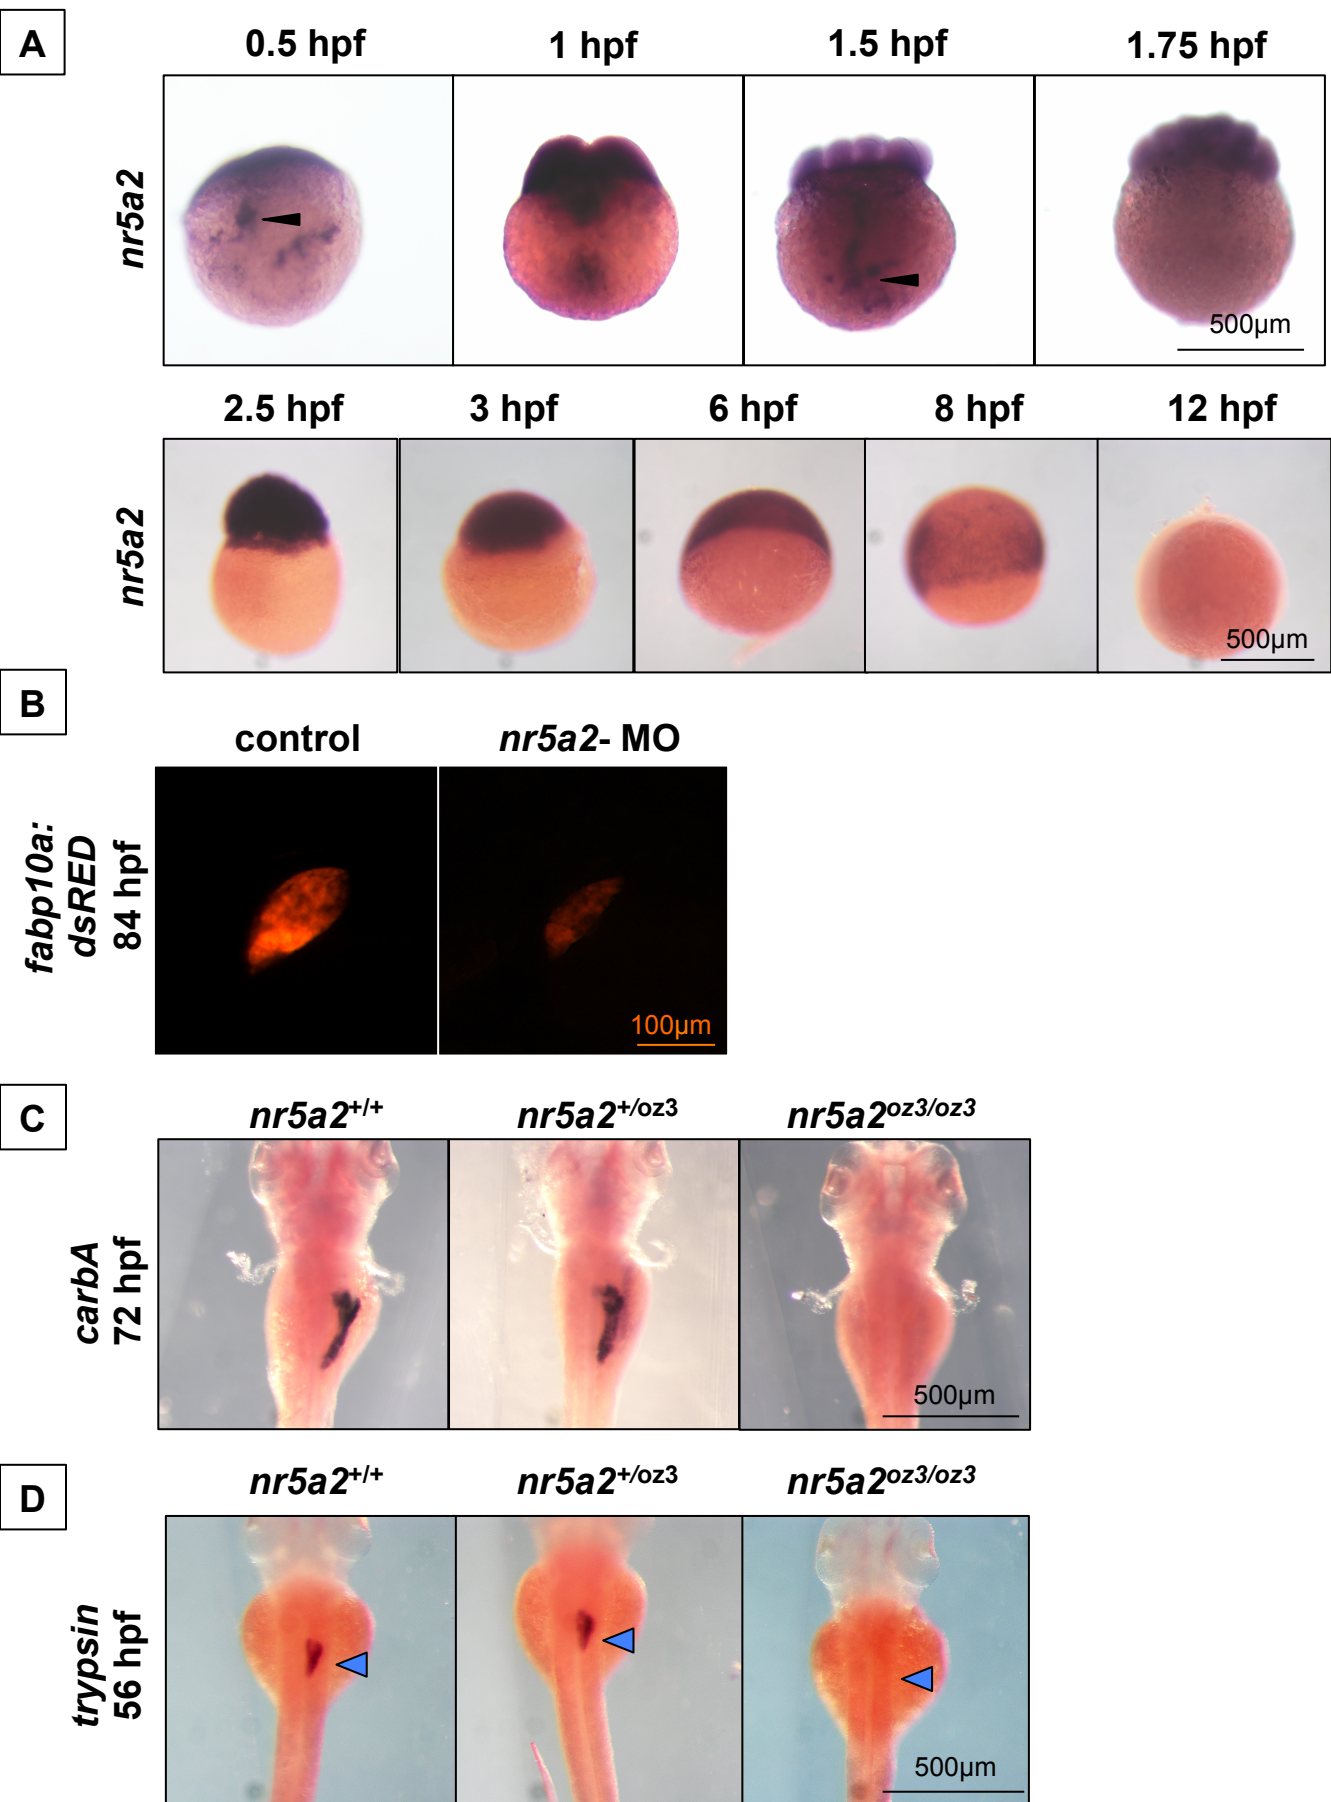

**Figure S2**

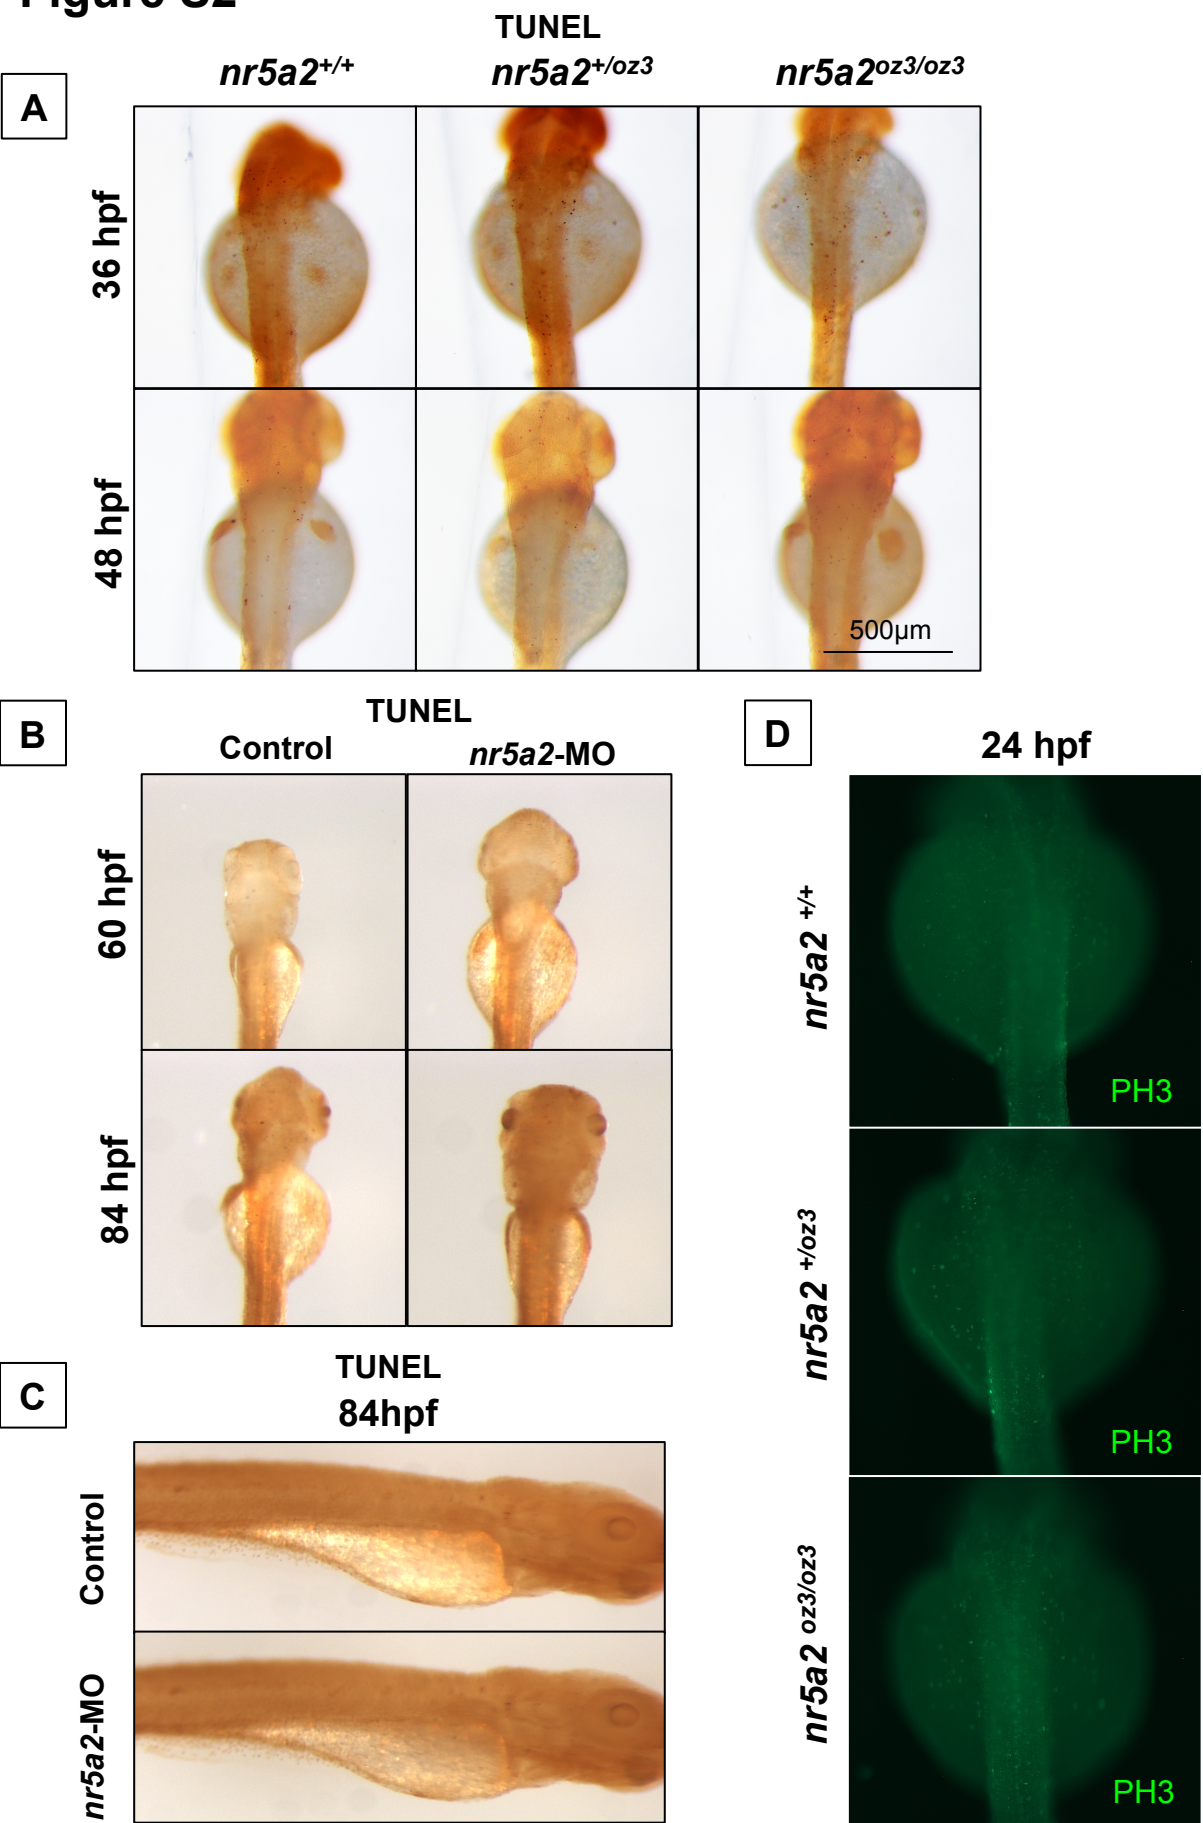

Figure S3

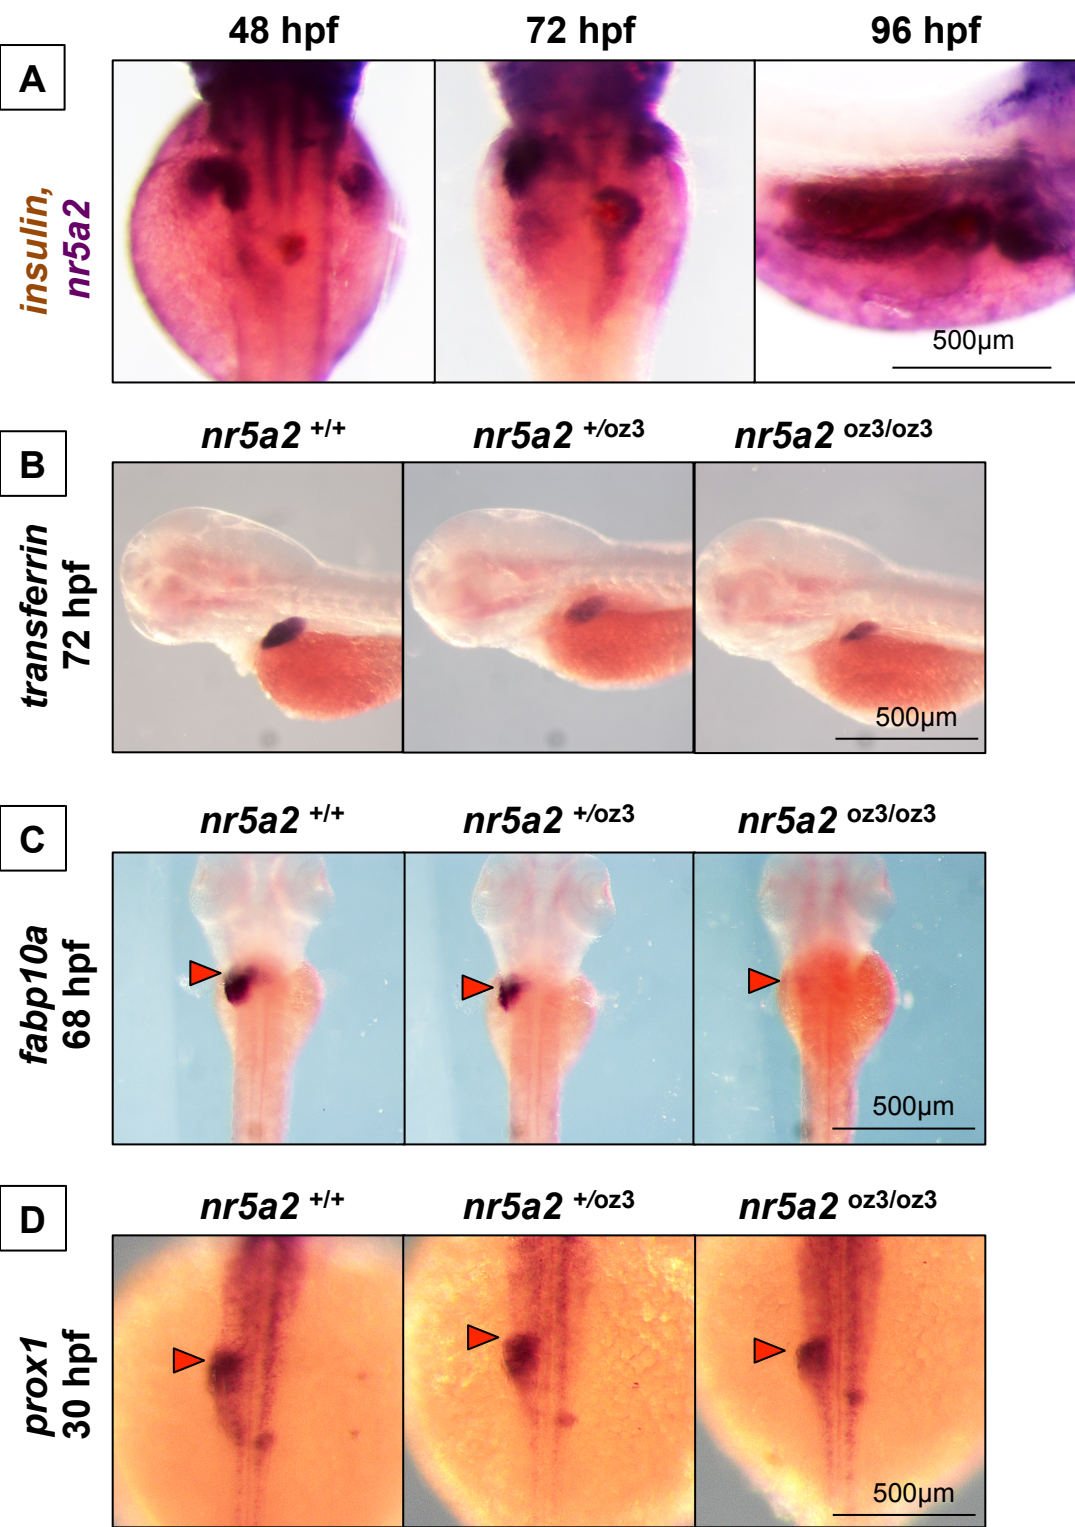

Figure S4

A

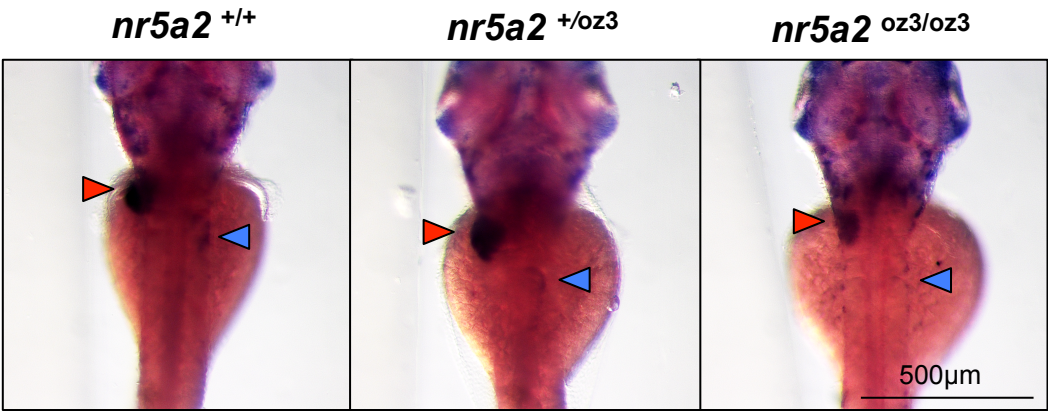

B

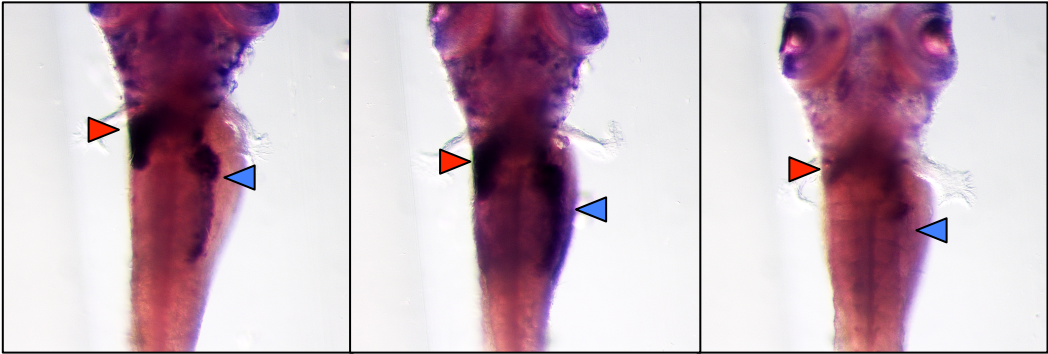

# Figure S5

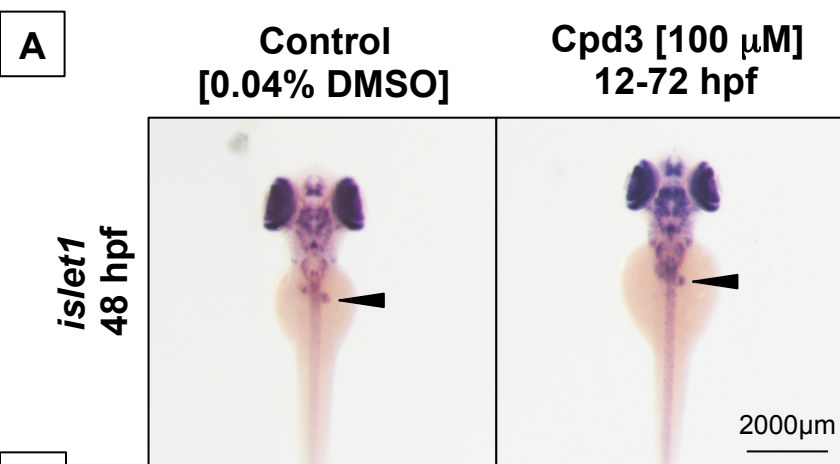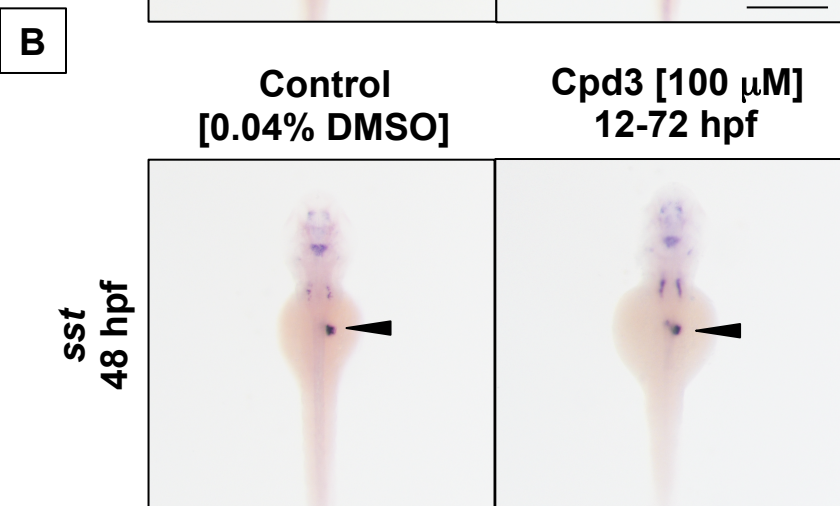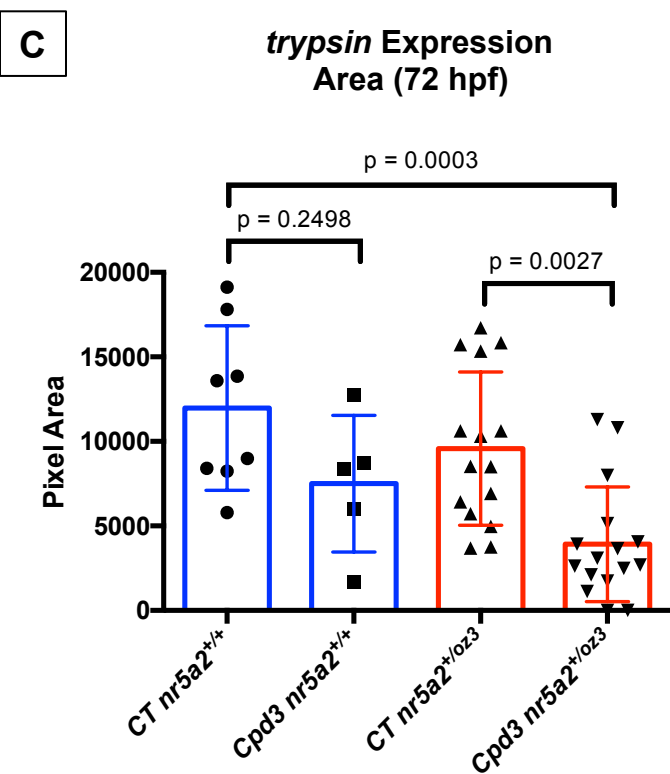

Figure S6

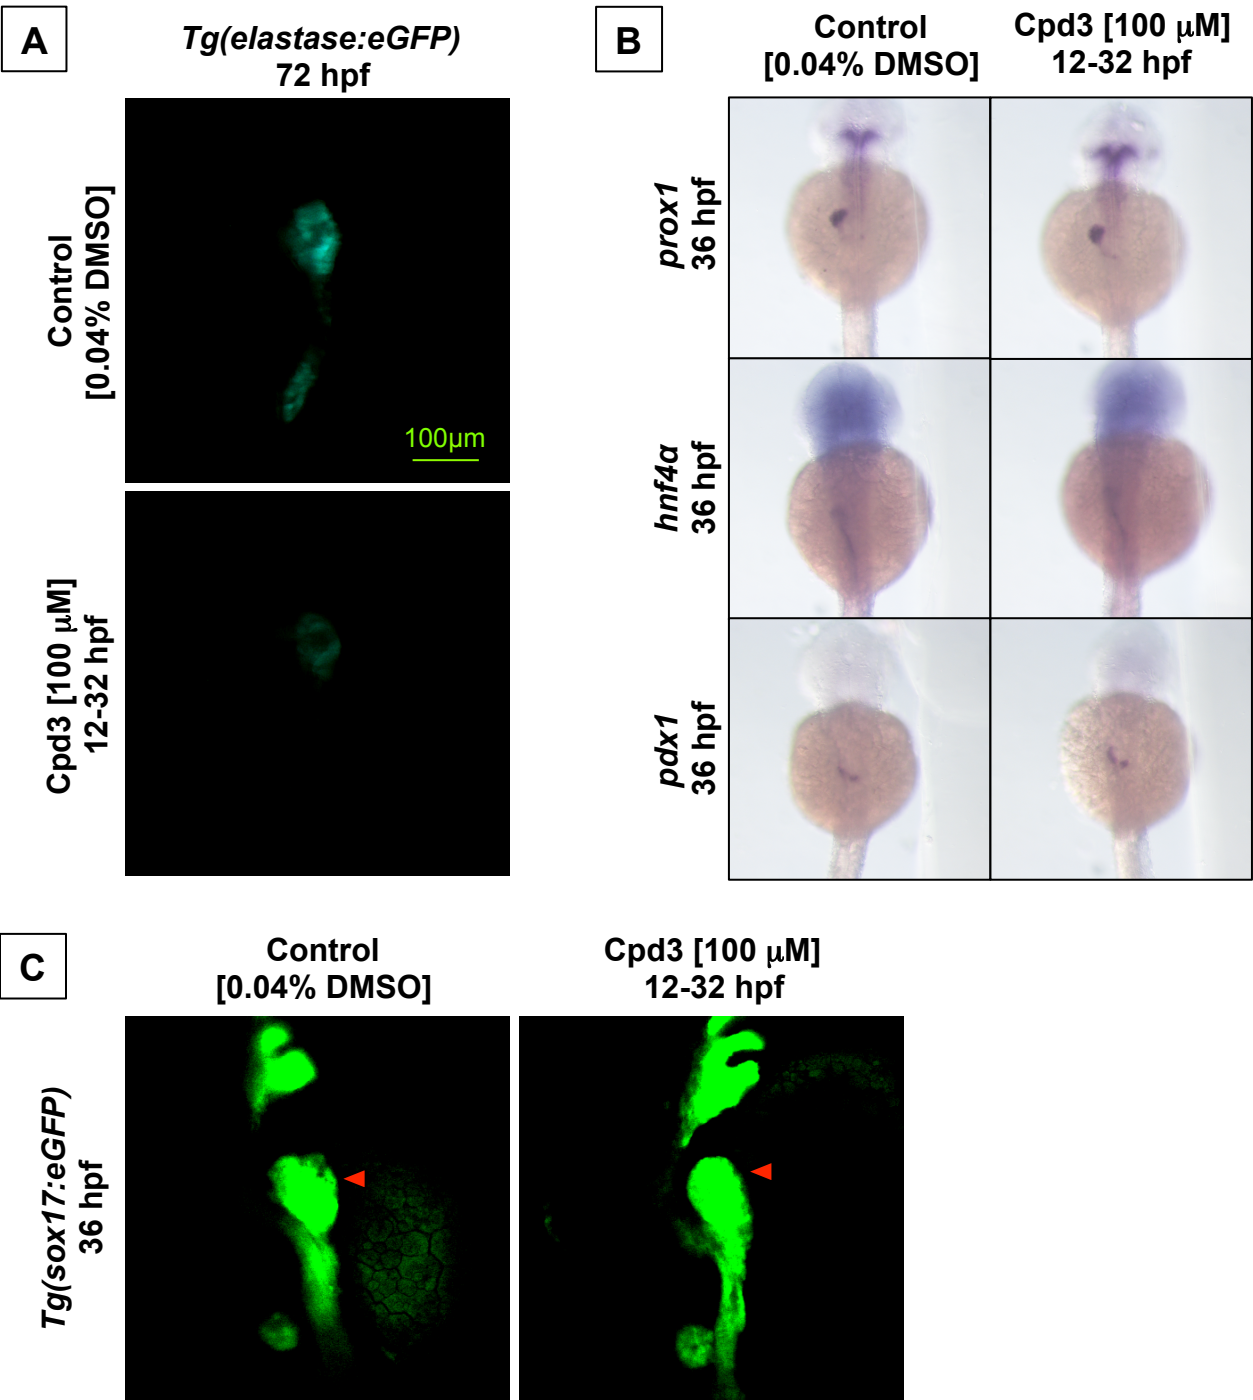

**Figure S7**

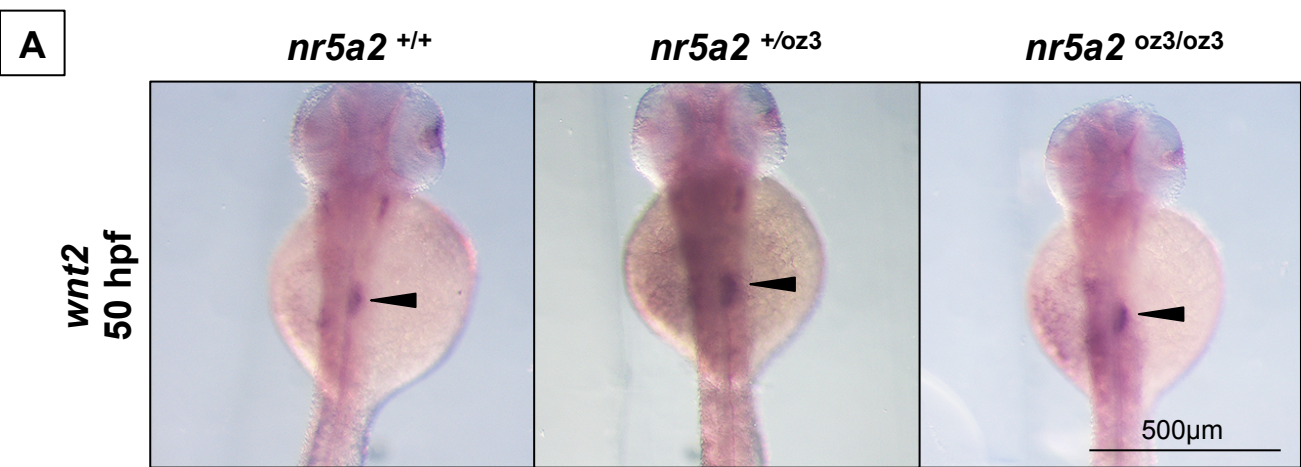

**B**

**Expression of Wnt Target Genes  
Following Nr5a2 Loss of Function  
(72 hpf)**

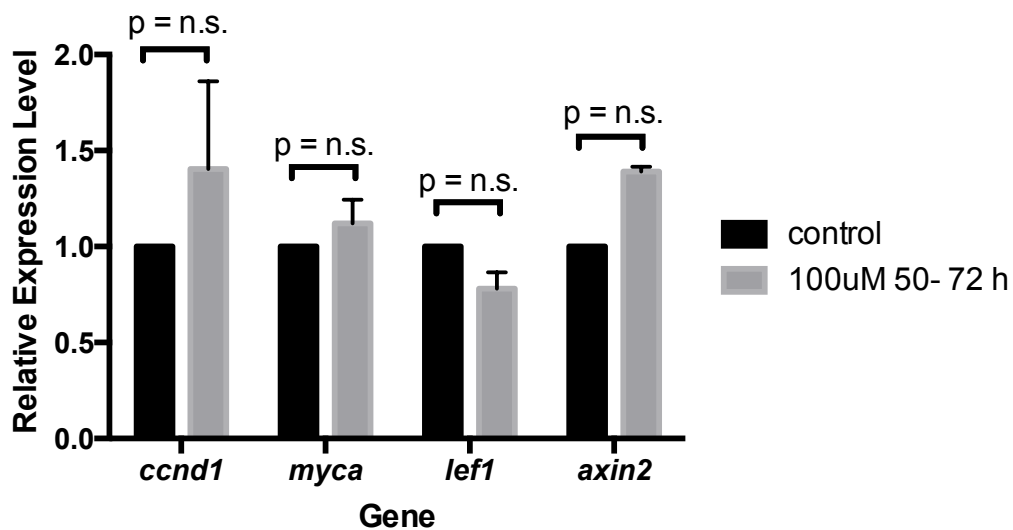

## SUPPLEMENTARY FIGURES

### Figure S1. Nr5a2 is required for the formation of the mature pancreas and liver

- A) *nr5a2* expression in zygote through early segmentation stages. *nr5a2* is maternally deposited and expressed in the dividing blastomeres. *nr5a2* mRNA is actively shuttled to the dividing blastomeres in vesicles (black arrows) by the 1-cell to 2-cell stage. Expression of *nr5a2* persists to approximately 12 hpf, after which it is temporarily inactivated.
- B) *nr5a2* morpholino injected *Tg(fabp10a:DsRed)* embryos have a reduced embryonic liver at 80 hpf.
- C) *nr5a2*<sup>oz3/oz3</sup> embryos lack a mature exocrine pancreas by *in situ* hybridization for *carboxypeptidase A5 (carbA)*.
- D) *trypsin*<sup>+</sup> acinar cells fail to form in the pancreas region (blue arrows) of *nr5a2*<sup>oz3/oz3</sup> mutant embryos by 56 hpf.

### Figure S2. *nr5a2* mutants and morphants display normal cell death and proliferation programs

- A) TUNEL staining in *nr5a2*<sup>+/+</sup>, *nr5a2*<sup>+/oz3</sup>, and *nr5a2*<sup>oz3/oz3</sup> mutant embryos at 36 – 48 hpf. *nr5a2*<sup>oz3/oz3</sup> mutants do not show indications of excess cell death relative to *nr5a2*<sup>+/+</sup> sibling controls.
- B) TUNEL staining in *nr5a2* morphant embryos at 60 - 84 hpf. *nr5a2* morphants do not show indications of excess cell death relative to controls, demonstrating that cell death is not a likely cause of liver or exocrine pancreas reduction.

- C) TUNEL staining in *nr5a2* morphant embryos at 84 hpf. *nr5a2* morphants do not show indications of excess cell death relative to controls, demonstrating that cell death is not a likely cause of exocrine pancreas reduction.
- D) Immunohistochemistry for phospho-histone 3 (PH3) at 24 hpf. *nr5a2<sup>oz3/oz3</sup>* embryos have no indication of reduced cellular proliferation in the endoderm region.

**Figure S3. Additional *nr5a2<sup>oz3</sup>* mutant phenotyping**

- A) Double *in situ* hybridization for *insulin* (brown) and *nr5a2* (purple) from 48 – 96 hpf. *nr5a2* and *insulin* are independently expressed from 72 – 96 hpf.
- B) *In situ* hybridization for mature hepatocyte marker *transferrin A* demonstrates that *nr5a2<sup>oz3/oz3</sup>* embryos have a reduced liver size.
- C) *In situ* hybridization for *fabp10a* at 68 hpf reveals that *fabp10a*<sup>+</sup> hepatocytes fail to form in the liver region of *nr5a2<sup>oz3/oz3</sup>* embryos (red arrows).
- D) *nr5a2<sup>oz3/oz3</sup>* embryos have normal *prox1* expression in the liver and pancreas regions at 30 hpf.

**Figure S4. *Prox1* expression in the *nr5a2<sup>oz3</sup>* mutant liver and pancreas regions**

- A) *prox1* expression is reduced in the liver bud (red arrows) and absent in the pancreas bud (blue arrows) of *nr5a2<sup>oz3/oz3</sup>* embryos at 72 hpf.
- B) *prox1* expression is reduced in the liver bud (red arrows) and absent in the pancreas bud (blue arrows) of *nr5a2<sup>oz3/oz3</sup>* embryos at 96 hpf, demonstrating that *prox1* expression in the endoderm does not recover.

### Figure S5. Effects of Cpd3 exposure on pancreas development

- A) Endocrine pancreas cells (black arrows) expressing *islet1* are present by *in situ* hybridization in embryos treated with Cpd3 from 12 – 72 hpf.
- B)  $\delta$ -cells expressing *somatostatin* (*sst*) (black arrows) are present by *in situ* hybridization in embryos treated with Cpd3 from 12 – 72 hpf.
- C) Quantification of exocrine pancreas size by area of *trypsin* expression at 72 hpf. 200  $\mu$ M Cpd3 treatment elicits a robust reduction in pancreas size in heterozygote *nr5a2*<sup>+/*oz3*</sup> embryos relative to control *nr5a2*<sup>+/*oz3*</sup> siblings and control *nr5a2*<sup>+/+</sup> embryos. (n > 5 per group; for control *nr5a2*<sup>+/+</sup> vs. Cpd3 treated *nr5a2*<sup>+/+</sup>, p = 0.2498; for control *nr5a2*<sup>+/*oz3*</sup> vs Cpd3 treated *nr5a2*<sup>+/*oz3*</sup>, p = 0.0027; for control *nr5a2*<sup>+/+</sup> vs. Cpd3 treated *nr5a2*<sup>+/*oz3*</sup>, p = 0.0003; ordinary one-way ANOVA with Tukey's multiple comparisons test).

### Figure S6 Effects of 12 – 32 hpf Cpd3 exposure on pancreas, liver, and hepatopancreas progenitor development

- A) Cpd3 treatment from 12 – 32 hpf reduces the size of the exocrine pancreas in *Tg(elastase:eGFP)* embryos at 72 hpf.
- B) Cpd3 treatment from 12 – 32 hpf does not impact the size of the *prox1*, *hnf4a*, and *pdx1* liver and pancreas progenitor populations.
- C) Cpd3 treatment from 12 – 32 hpf does not increase the size of the liver bud (red arrow) by confocal imaging of *Tg(sox17:eGFP)* embryos.

### Figure S7: Wnt expression and signaling in *Nr5a2* mutants and morphants

- A) *wnt2* expression in the mesoderm region between the swim bladder and pancreas (arrows) is unaffected in *nr5a2*<sup>+/oz3</sup> and *nr5a2*<sup>oz3/oz3</sup> embryos relative to controls.
- B) qPCR for Wnt target genes in whole embryos reveals that alterations in Nr5a2 activity by antagonist Cpd3 from 50 – 72 hpf does not significantly impact Wnt pathway activity.

**Supplementary Table 1. qRT-PCR Primers**

|                |                                  |
|----------------|----------------------------------|
| <i>nr5a2 F</i> | 5' TCA GCT TGG ACG TGA AGA AC 3' |
| <i>nr5a2 R</i> | 5' AAC TTG TCT GTC TGC TGA GG 3' |
| <i>ef1α F</i>  | 5' GCG TCA TCA AGA GCG TTG AG 3' |
| <i>ef1α R</i>  | 5' TTG GAA CGG TGT GAT TGA GG 3' |
| <i>axin2 F</i> | 5' GGACACTTCAAGGAACAACACTAC 3'   |
| <i>axin2 R</i> | 5' CCTCATACATTGGCAGAACTG 3'      |
| <i>lef1 F</i>  | 5' GAGGGAAAAGATCCAGGAAC 3'       |
| <i>lef1 R</i>  | 5' AGGTTGAGAAGTCTAGCAGG 3'       |
| <i>ccnd1 F</i> | 5' GGAAGTCTGGCGCTAAATA 3'        |
| <i>ccnd1 R</i> | 5' GACTTGCGAGAGGAAGTTGG 3'       |
| <i>myca F</i>  | 5' TGAAGTGTGAAAAGCGACAG 3'       |
| <i>myca R</i>  | 5' GCTGCTGTTGATGCTGTGAT 3'       |
